# Supplementary material for: Empowering Neurodiversity - Analyzing the Potential of Visual Data Annotation as Employment for Autistic Individuals
Source: Research Square preprint supplement (doi:10.21203/rs.3.rs-6646902/v1), 2025-07-07
Supplement: Supplementary file 1 [file 0500964eccac432db274b8f0.docx]

# Supplementary Material

**Table 1 suppl.** Self-Assessment of job-related strengths (questionnaire translated from German by the authors)

| **We kindly ask you to assess how the following statements  apply to you.** 0=”Totally disagree”; 3=”Totally agree” | | Mean (SD)  EG  N=19 | Mean (SD)  CG N=17 |
| --- | --- | --- | --- |
|  | A precise way of working characterizes me. | 2.26 (.65) | 2.18 (.39) |
|  | Monotonous or repetitive tasks are not a problem for me. | 1.89 (.88) | 1.82 (.95) |
|  | I find it easy to make decisions. | 1.16 (.69) | 2.00 (.79) |
|  | I don’t mind performing the same tasks repeatedly in the same way. | 2.00 (.75) | 2.29 (.69) |
|  | I enjoy completing tasks in an accurate manner. | 2.58 (.69) | 1.88 (.49) |
|  | I complete my tasks conscientiously because the quality of my work/product is important to me. | 2.74 (.45) | 2.71 (.47) |
|  | I don’t give up easily, even when it gets difficult. | 2.11 (.66) | 2.24 (.56) |
|  | I have extensive experience with digital technologies (PCs, internet, software, etc.). | 2.32 (.67) | 2.82 (.39) |
|  | I can retain information well over an extended period. | 2.00 (.75) | 2.18 (.81) |
|  | I enjoy searching for new information and explanations. | 2.42 (.61) | 2.00 (.71) |
|  | I like spending my free time with digital technologies (PC games, programming, internet, etc.). | 2.58 (.61) | 2.59 (.80) |
|  | Researching information and explanations on various topics on the internet is fun for me. | 2.37 (.76) | 2.18 (.73) |
|  | I immediately notice small deviations in details. | 2.37 (.68) | 2.06 (.66) |
|  | My memory (ability to retain information) is one of my strengths. | 1.89 (.81) | 1.82 (1.07) |
|  | Plans and visualizations of how something should proceed have been helpful to me in the past. | 2.47 (.70) | 2.24 (.83) |
|  | I quickly notice differences in my surroundings (e.g., light, room arrangement, pictures, etc.). | 2.32 (.89) | 2.41 (.71) |
|  | When completing a multi-step task, a structuring aid (e.g., visual, from other people) would help me. | 2.42 (.69) | 2.00 (.71) |
|  | When I set myself a goal, I follow through. | 2.16 (.83) | 2.29 (.69) |
|  | When I finish something, I consider what to do next or I ask relevant people. | 2.16 (.77) | 2.00 (.61) |
|  | If someone asks for my judgment, I quickly give a clear answer. | 1.74 (.93) | 1.88 (.78) |

**Table 2 suppl**.: Feedback and evaluation form according to study procedures (questionnaire translated from German by the authors)

| **Lastly, we kindly ask you to evaluate the following questions from YOUR perspective.  Please provide open suggestions and feedback on the current study.**  1=”Totally disagree”; 4=”Totally agree” | | Mean (SD) EG  N=17 |
| --- | --- | --- |
|  | I was fully informed about the aim and purpose of the study. | 3.65 (.49) |
|  | It was easy to find the time required to participate in this study | 3.47 (.72) |
|  | The clinical examination (reading, concentration, IQ) was laborious. | 1.94 (.83) |
|  | I found most of the assessment questionnaires useful. | 3.35 (.79) |
|  | I would have liked more appointments for the testing. | 2.07 (1.10) |
|  | The instructions for the annotation tool were easy to understand. | 3.23 (.90) |
|  | The questionnaires were clearly formulated. | 3.65 (.61) |
|  | Additional information provided by the smartwatch was helpful. | 3.00 (1.25) |
|  | The study was conducted in a pleasant manner. | 3.76 (.56) |
|  | The instructions on the questionnaires were easy to understand. | 3.35 (.79) |
|  | I would like to learn more about annotation in the future. | 2.88 (.86) |
|  | I could imagine working in the field of annotation. | 2.59 (1.00) |
|  | I would participate in the study again. | 3.59 (.71) |
